# Supplementary material for: Anchoring Ni3S2/Cr(OH)3 hybrid nanospheres on Ti3C2@NF dual substrates by ion exchange for efficient urea electrolysis
Source: Royal Society of Chemistry journal article supplement (doi:10.1039/d3nr02524a), 2023-01-01
Supplement: d3nr02524a1.pdf [file d3nr02524a1.pdf]

# Supporting Information

## **Anchoring Ni<sub>3</sub>S<sub>2</sub>/Cr(OH)<sub>3</sub> hybrid nanospheres on Ti<sub>3</sub>C<sub>2</sub>@NF dual substrates by ion exchange for efficient urea electrolysis**

Yifeng Liu, Qianqiao Chen\* and Qin zhong

\*Email: [cqq@njust.edu.cn](mailto:cqq@njust.edu.cn) (Qianqiao Chen)

### **Experimental Section**

#### **1. Materials**

Ni(NO<sub>3</sub>)<sub>3</sub>·6H<sub>2</sub>O, Cr(NO<sub>3</sub>)<sub>3</sub>·9H<sub>2</sub>O, Na<sub>2</sub>S·9H<sub>2</sub>O, Ti<sub>3</sub>AlC<sub>2</sub>(200 mesh), LiF, HCl, KOH, urea and nickel foam(NF) were purchased from Shanghai Aladdin Biochemical Technology Co. Ltd. De-ionized water (resistance of 18.2 MΩ·cm<sup>-1</sup> at 25 °C) was used for all experiments. Unless otherwise specified, all reagents are analytically pure without further processed.

#### **2. Sample preparation**

##### **Synthesis of few-layered Ti<sub>3</sub>C<sub>2</sub>**

Before selective etching of Ti<sub>3</sub>AlC<sub>2</sub> MAX power, the size of Ti<sub>3</sub>AlC<sub>2</sub> particles was screened to less than 40 μm by 400 mesh sieve. Firstly, 1.6 g LiF was added into 20 mL 12 M HCl under stirring for 5min. Then, 1g

Ti<sub>3</sub>AlC<sub>2</sub> powder was slowly added into the solution to prevent the mixed solution from boiling over. The mixed solution was stirred at room temperature for 36 h to obtain Ti<sub>3</sub>C<sub>2</sub> MXene. Afterward, the sample was centrifuged several times with deionized water until the pH of the supernatant was neutral. Subsequently, the as-prepared Ti<sub>3</sub>C<sub>2</sub> precipitate was dissolved in deionized water, sonicated in ice bath for 1h. Finally the dark green supernatant was obtained by centrifugation at 3000 rpm for 30min and named as few-layered Ti<sub>3</sub>C<sub>2</sub>. The Ti<sub>3</sub>C<sub>2</sub> suspension was stored in a 4 °C refrigerator.

#### **Synthesis of Ti<sub>3</sub>C<sub>2</sub>@NF**

First of all, The NF (1 cm×2 cm) was cleaned with 3 M HCl, acetone, deionized water and ethanol by ultrasonic cleaning for 10 min to remove the surface oxide layer and improve its hydrophilicity, and dried under vacuum at 60 °C for 12 h. Then, The few layered Ti<sub>3</sub>C<sub>2</sub> was adsorbed on NF by electrostatic adsorption method. Cleaned NF was soaked in the prepared Ti<sub>3</sub>C<sub>2</sub> suspension for 2 h and taken out. Ti<sub>3</sub>C<sub>2</sub>@NF was obtained after vacuum drying for 12 h. The comparison chart is shown in Fig. S1.

#### **Synthesis of Ni<sub>3</sub>S<sub>2</sub>/Cr(OH)<sub>3</sub>-Ti<sub>3</sub>C<sub>2</sub>@NF electrode**

Firstly, 0.8 mM Ni(NO<sub>3</sub>)<sub>3</sub>·6H<sub>2</sub>O and 0.2 mM Cr(NO<sub>3</sub>)<sub>3</sub>·9H<sub>2</sub>O were dissolved in 20 mL deionized water, and then Ti<sub>3</sub>C<sub>2</sub>@NF was put into the mixed solution and stirred for 1 h. Then 20 mL 0.025 M Na<sub>2</sub>S solution was dropped into the above solution using a micro syringe. Ni<sub>3</sub>S<sub>2</sub> is formed by

ion exchange, while  $\text{Cr}(\text{OH})_3$  is formed by double hydrolysis reaction in aqueous solution with continuous stirring during the reaction. Finally, the NF was taken out and dried at  $60\text{ }^\circ\text{C}$  for 12 h under vacuum to obtain  $\text{Ni}_3\text{S}_2/\text{Cr}(\text{OH})_3\text{-Ti}_3\text{C}_2@\text{NF}$  electrode.

### **3. Materials characterization**

The XRD patterns were obtained by using a Pgeneral XD-30 system with  $\text{Cu } \alpha$  radiation. The scanning electron microscopy(SEM) images were recorded by JEOL JSM-6700F SEM. The high-resolution TEM(HRTEM) was performed on a JEOL-2010 microscopy operated at 200kV. X-ray photoelectron spectroscopy(XPS) spectra was obtained on a Thermo Scientific ESCALAB 250Xi spectrometer with  $\text{Al } K\alpha$  radiation.

### **4. Electrochemical measurements**

All electrochemical tests were measured at room temperature in a three-electrode system linked with the Ivium-N-Stat electrochemical workstation. The catalyst-loaded NF ( $1 \times 1\text{ cm}^2$ ) was used as the working electrode directly. Saturated calomel electrode(SCE)and graphite electrode were used as reference electrode and counter electrode, respectively. All potentials in this work were converted to a reversible hydrogen electrode (RHE) by the formula of :  $E(\text{RHE})=E(\text{Hg}/\text{HgO})+0.059 \times \text{pH}+0.098$ . All the catalytic performance were tested in the electrolyte of 1 M KOH with 0.5 M urea. The catalyst activity was assessed by scanning the LSV at a rate of  $5\text{mV s}^{-1}$ . 95% iR-correction was performed to all the polarization curves.

The electrochemical impedance spectroscopy (EIS) were measured in the frequency range from 100 kHz to 0.1 Hz. In the non-Faradaic reaction zone, the cyclic voltammetry (CV) curves of the sample was recorded at different scan rate (20-100 mV s<sup>-1</sup>), and the value of double layer capacitance ( $C_{dl}$ ) was calculated from CV curves. The stability of samples were tested by i-t Chronoamperometry.

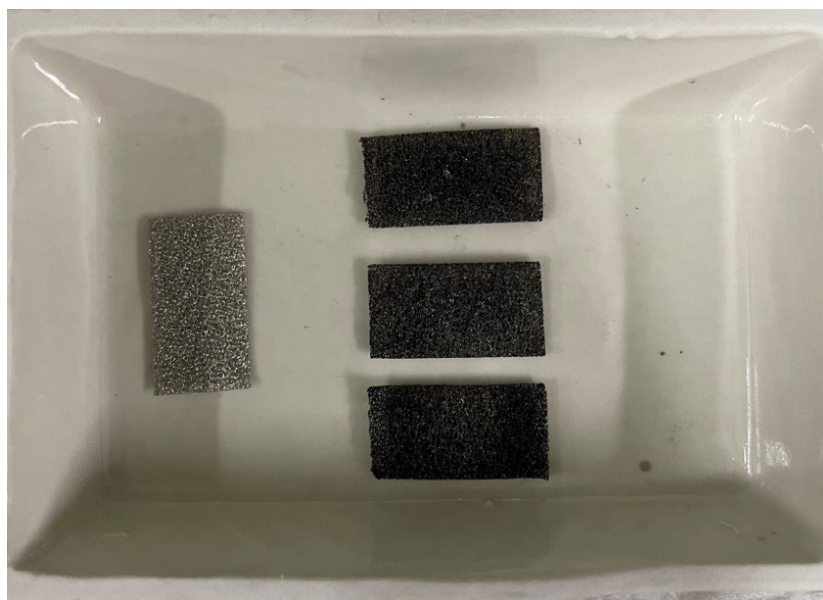

**Fig. S1 Comparison chart of NF and Ti<sub>3</sub>C<sub>2</sub>@NF**

**Table S1** Comparison of adsorption time and the mass load of Ti<sub>3</sub>C<sub>2</sub>

|                                  | 10 min | 30 min | 1 h    | 2 h    | 4 h    | 6h     |
|----------------------------------|--------|--------|--------|--------|--------|--------|
| NF before adsorption (g)         | 0.0634 | 0.0641 | 0.0621 | 0.0663 | 0.0652 | 0.0647 |
| NF after adsorption (g)          | 0.0634 | 0.0643 | 0.0623 | 0.0667 | 0.0658 | 0.0653 |
| Mass load (mg cm <sup>-2</sup> ) | 0      | 0      | 0.1    | 0.2    | 0.4    | 0.4    |

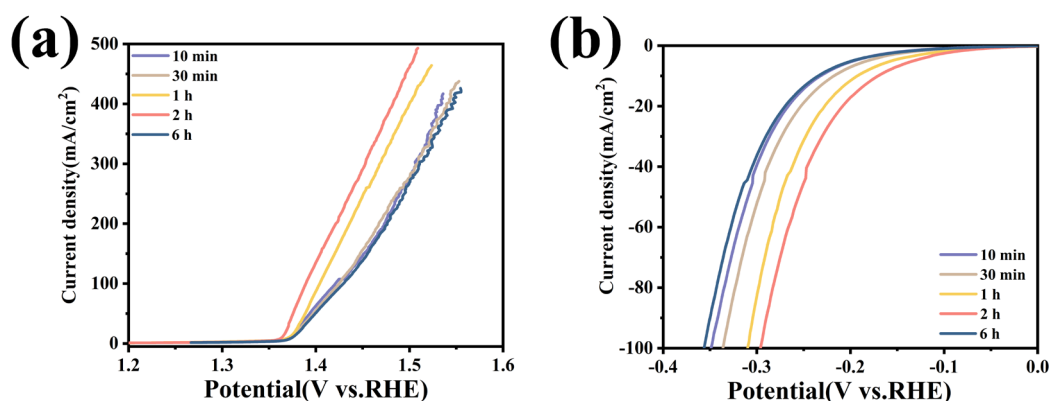

**Fig. S2 (a) The LSV curves of UOR for different adsorption time of  $\text{Ti}_3\text{C}_2$ . (b) HER curves.**

The adsorption time and the suspension concentration may affect the mass load of  $\text{Ti}_3\text{C}_2$ . We explore the effect of adsorption time on the mass load of  $\text{Ti}_3\text{C}_2$  and the catalytic activity of the electrode. The time is chosen as 10 min to 6 h. As shown in Table S1, the mass load of  $\text{Ti}_3\text{C}_2$  increased gradually with adsorption time. After 4 h, the adsorption capacity remained basically unchanged. Under the same other preparation conditions, the linear sweep voltammetry (LSV) test of the catalyst obtained with different  $\text{Ti}_3\text{C}_2$  adsorption time is shown in Fig. S2. It can be seen that the adsorption time of 2 h and the mass load of  $0.2 \text{ mg cm}^{-2}$  shows optimal performance.

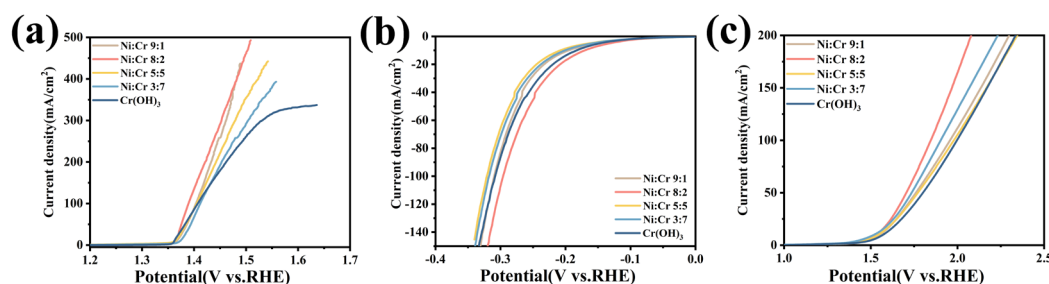

**Fig. S3 (a) The LSV curves of UOR for different molar ratio of Ni, Cr. (b) HER curves. (c) Urea electrolysis.**

The content effect of  $\text{Ni}_3\text{S}_2$  and  $\text{Cr}(\text{OH})_3$  on the electrochemical performance of the electrode is investigated by changing feed ratio of Ni and Cr sources. As shown in Fig. S3 (a)~(c), the electrode exhibits optimal performance at feed ratio of Ni, Cr is 8:2 (0.8 mM  $\text{Ni}(\text{NO}_3)_3 \cdot 6\text{H}_2\text{O}$  and 0.2 mM  $\text{Cr}(\text{NO}_3)_3 \cdot 9\text{H}_2\text{O}$ ), and the electrocatalytic performance decreases with the decrease of Ni content, which corroborates the fact that Ni-based catalysts are mainly based on Ni elements as the active sites.

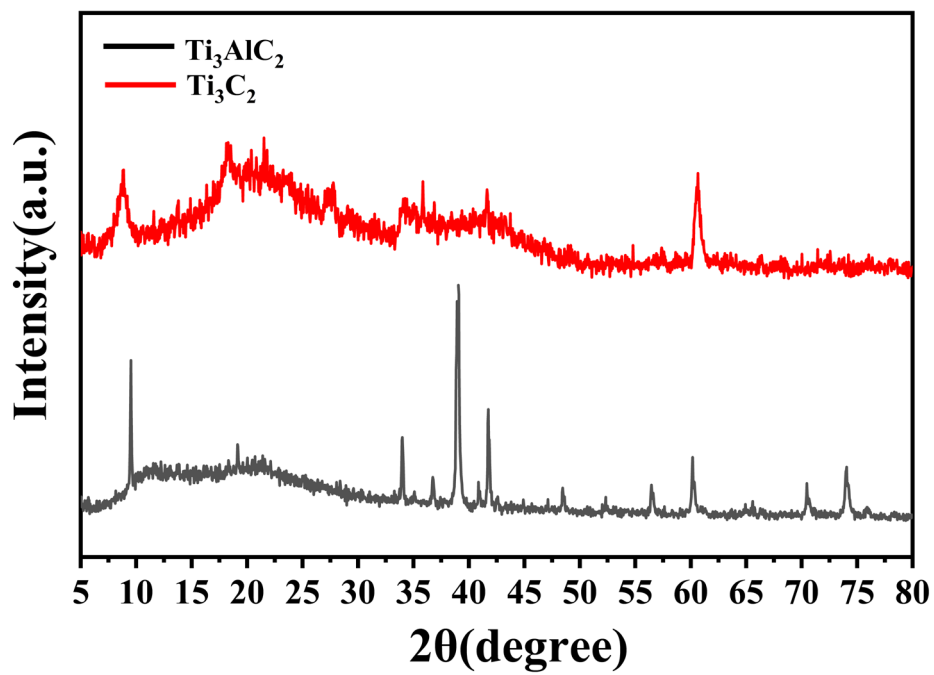

Fig. S4 XRD pattern of  $\text{Ti}_3\text{AlC}_2$  and  $\text{Ti}_3\text{C}_2$

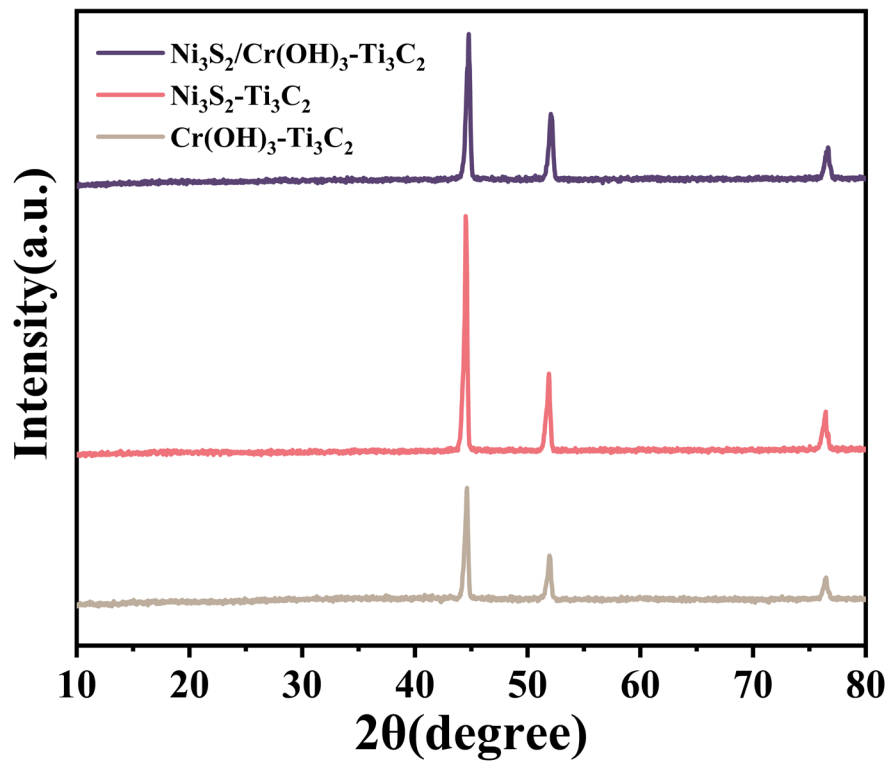

Fig. S5 XRD patterns of  $\text{Ni}_3\text{S}_2/\text{Cr}(\text{OH})_3\text{-Ti}_3\text{C}_2$ ,  $\text{Ni}_3\text{S}_2\text{-Ti}_3\text{C}_2$  and  $\text{Cr}(\text{OH})_3\text{-Ti}_3\text{C}_2$ .

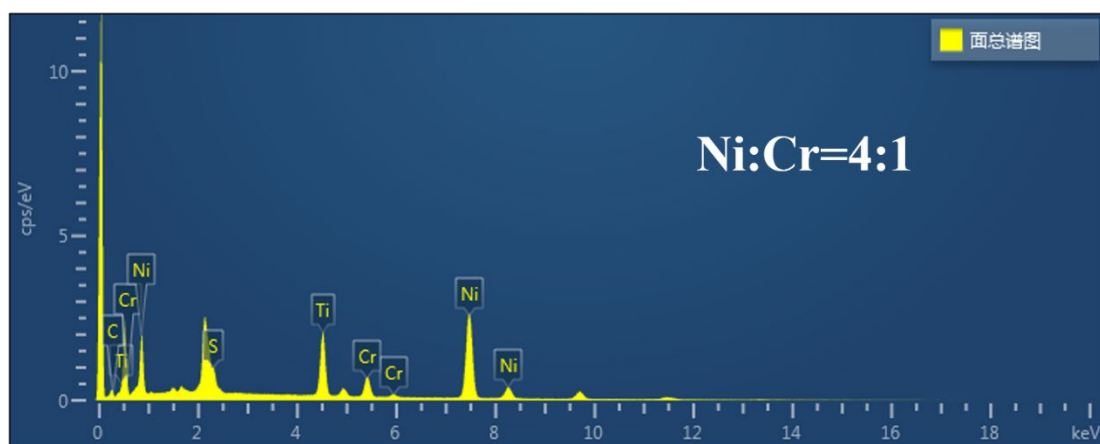

Fig. S6 EDS measurement of the prepared  $\text{Ni}_3\text{S}_2/\text{Cr}(\text{OH})_3\text{-Ti}_3\text{C}_2$  hybrid nanospheres.

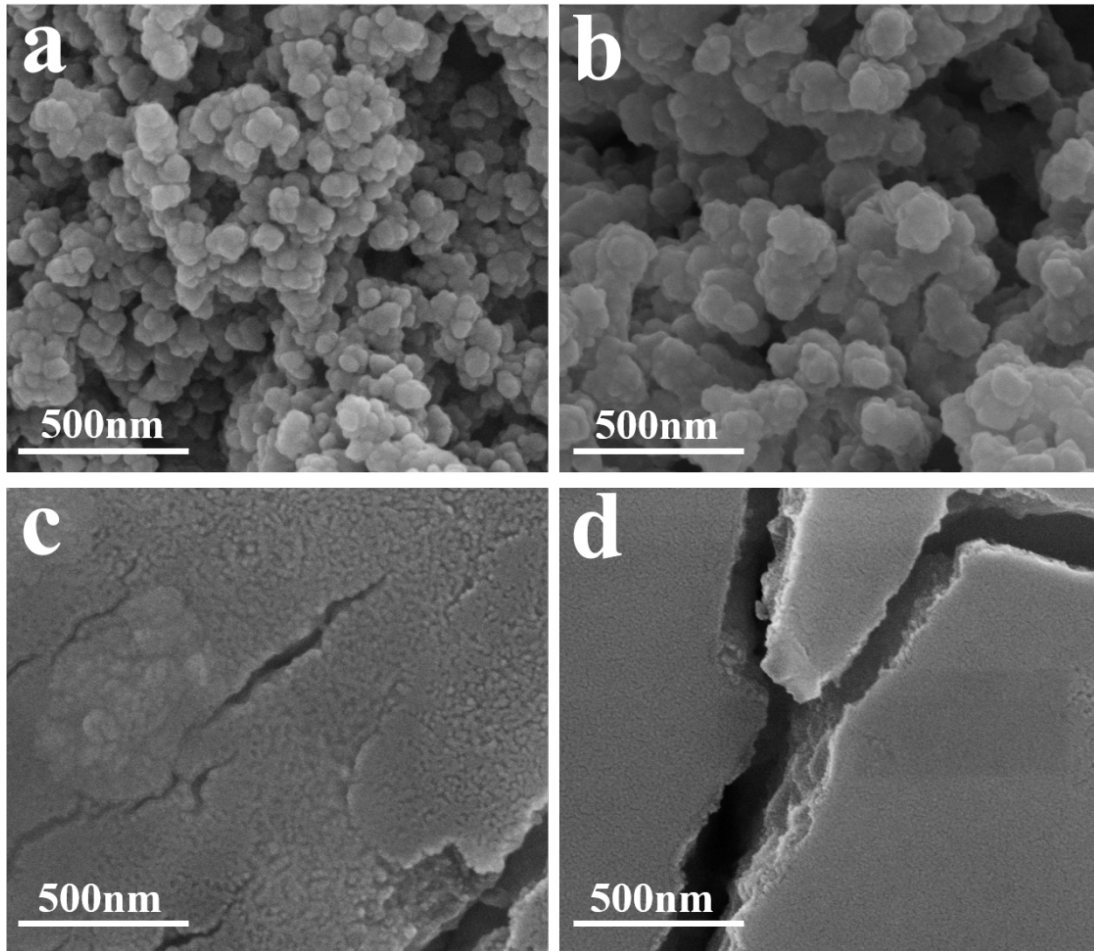

**Fig. S7 SEM images of (a~b)  $\text{Ni}_3\text{S}_2/\text{Cr}(\text{OH})_3\text{-Ti}_3\text{C}_2$ , (c~d)  $\text{Ni}_3\text{S}_2\text{-Ti}_3\text{C}_2$ .**



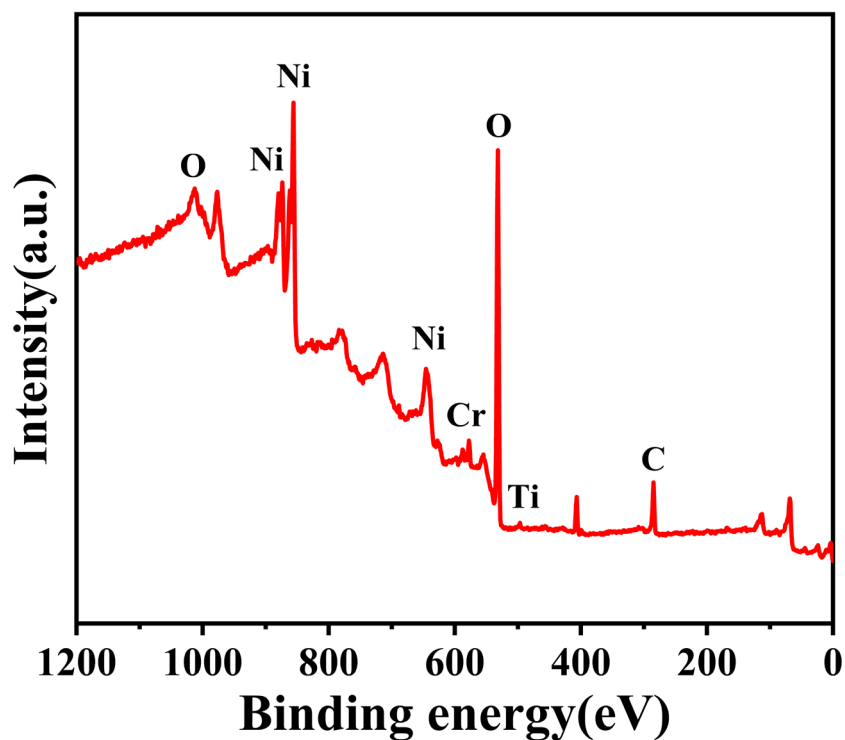

Fig. S8 XPS survey spectrum of  $\text{Ni}_3\text{S}_2/\text{Cr}(\text{OH})_3\text{-Ti}_3\text{C}_2@\text{NF}$ .

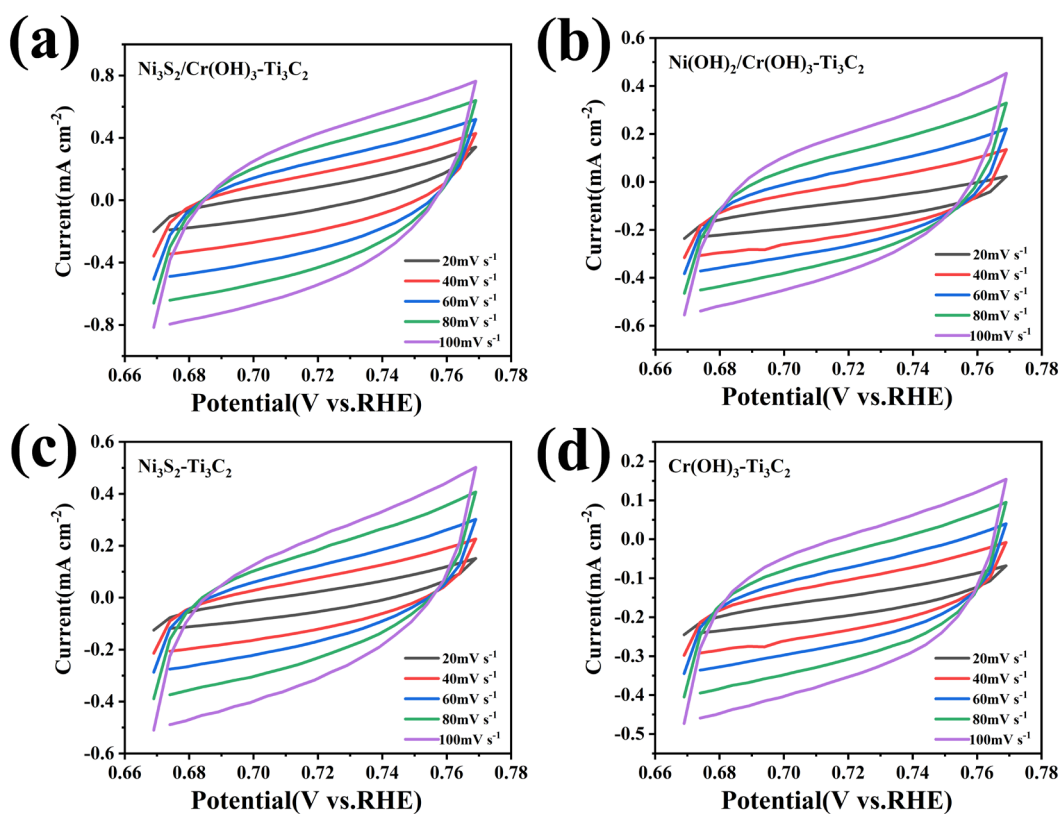

Fig. S9 CV curves of (a)  $\text{Ni}_3\text{S}_2/\text{Cr}(\text{OH})_3\text{-Ti}_3\text{C}_2$ , (b)  $\text{Ni}(\text{OH})_2/\text{Cr}(\text{OH})_3\text{-Ti}_3\text{C}_2$ , (c)  $\text{Ni}_3\text{S}_2\text{-Ti}_3\text{C}_2$ , (d)  $\text{Cr}(\text{OH})_3\text{-Ti}_3\text{C}_2$ .

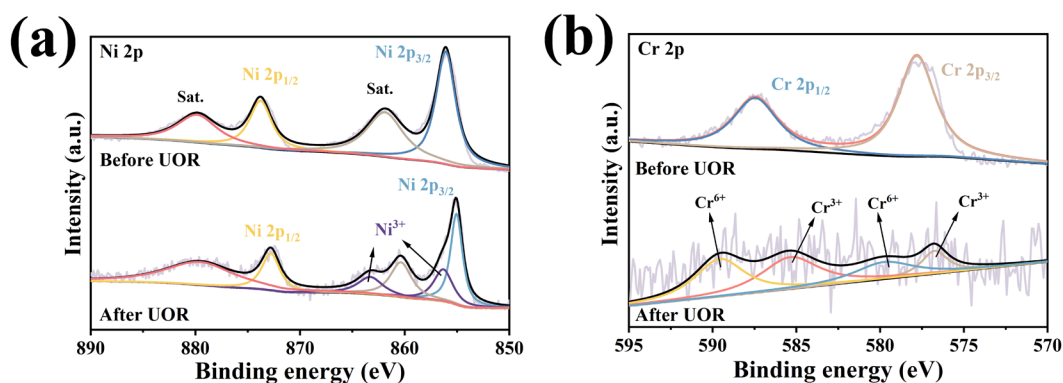

**Fig. S10** XPS spectra in regions of (a) Ni 2p, (b) Cr 2p before and after long durability test.

**Table S2** Comparison of different catalysts for urea electrolysis.

| Catalysts                                                                           | Urea concentration | Performance (mA cm <sup>-2</sup> ) | Corresponding V | References                                      |
|-------------------------------------------------------------------------------------|--------------------|------------------------------------|-----------------|-------------------------------------------------|
| Ni <sub>3</sub> S <sub>2</sub> /Cr(OH) <sub>3</sub> -Ti <sub>3</sub> C <sub>2</sub> | 0.5M               | 10<br>100                          | 1.36<br>1.39    | This work                                       |
| CoMn/CoMn <sub>2</sub> O <sub>4</sub>                                               | 0.5M               | 10                                 | 1.32            | Advanced Functional Materials, 2020, 30.        |
| graphene-MnO <sub>2</sub>                                                           | 0.5M               | 10                                 | 1.33            | Angew . Chem. Int. Ed. 2016, 55, 3804.          |
| NiMoO <sub>4</sub>                                                                  | 0.5 M              | 10                                 | 1.37            | Energy Environ. Sci. 2018, 11, 1890.            |
| Ni(OH) <sub>2</sub>                                                                 | 0.33 M             | 10                                 | 1.38            | Angew . Chem. Int. Ed. 2016, 55, 12465          |
| MnO <sub>2</sub> /MnCo <sub>2</sub> O <sub>4</sub>                                  | 0.5M               | 10                                 | 1.33            | J. Mater . Chem. A 2017, 5, 7825.               |
| Ni-Mo nanotube                                                                      | 0.1M               | 10                                 | 1.36            | Nano Energy 2019, 60, 894.                      |
| NiCo <sub>2</sub> O <sub>4</sub>                                                    | 0.33 M             | 250                                | 1.62            | Nanoscale 2014, 6, 1369.                        |
| Ni-MOF                                                                              | 0.33 M             | 10                                 | 1.36            | Chem. Commun. 2017, 53, 10906.                  |
| CoS <sub>2</sub> NA/Ti//CoS <sub>2</sub> NA/Ti                                      | 0.33M              | 10                                 | 1.59            | Electrochim. Acta 246 (2017) 776.               |
| NiO-NiPi                                                                            | 0.5M               | 10<br>100                          | 1.349<br>1.444  | Chem. Eng. J. 2021, 425, 130514-130524          |
| N-NiFe/WRIF// N-NiFe/WRIF                                                           | 0.33M              | 100                                | 1.58            | Chem. Eng. J. 2021, 414, 128753-128762.         |
| Ni <sub>3</sub> S <sub>2</sub> @CoMoS <sub>4</sub> /NiFeOOH//                       | 0.5M               | 100                                | 1.66            | Int. J. Hydrogen. Energ. 2021, 46, 24078-24093. |
| CoFeCr LDH                                                                          | 0.3M               | 100                                | 1.41            | Appl. Catal B. Environ. 2020, 272, 118959       |
| NiClO-D                                                                             | 0.3M               | 100                                | 1.44            | Angew. Chem. Int. Edit. 2019, 58, 16820         |
| Mo-Co-S-Se                                                                          | 0.5M               | 100                                | 1.42            | ACS Sustain. Chem. Eng. 2019, 7, 16577          |
| NF-Ni <sub>2</sub> P-Fe <sub>2</sub> P                                              | 0.5M               | 100                                | 1.46            | J. Colloid Interface Sci. 2019, 541, 279.       |
| S-MnO <sub>2</sub>                                                                  | 0.5M               | 100                                | 1.46            | Angew. Chem. Int. Ed., 2016, 55, 3804.          |

|                                      |       |     |       |                                      |
|--------------------------------------|-------|-----|-------|--------------------------------------|
| 1% Fe: $\alpha$ -Ni(OH) <sub>2</sub> | 0.33M | 100 | ~1.41 | Chem. Eur. J. 2018,24, 18408.        |
| NF/MiMoO-A                           | 0.5M  | 100 | 1.42  | Energy Environ. Sci.,2018, 11, 1890. |
